# Supplementary material
Source: PubMed Central journal article supplement (PMC7530375)
Supplement: bloodBLD2019003664-suppl1.pdf [file bloodBLD2019003664-suppl1.pdf]

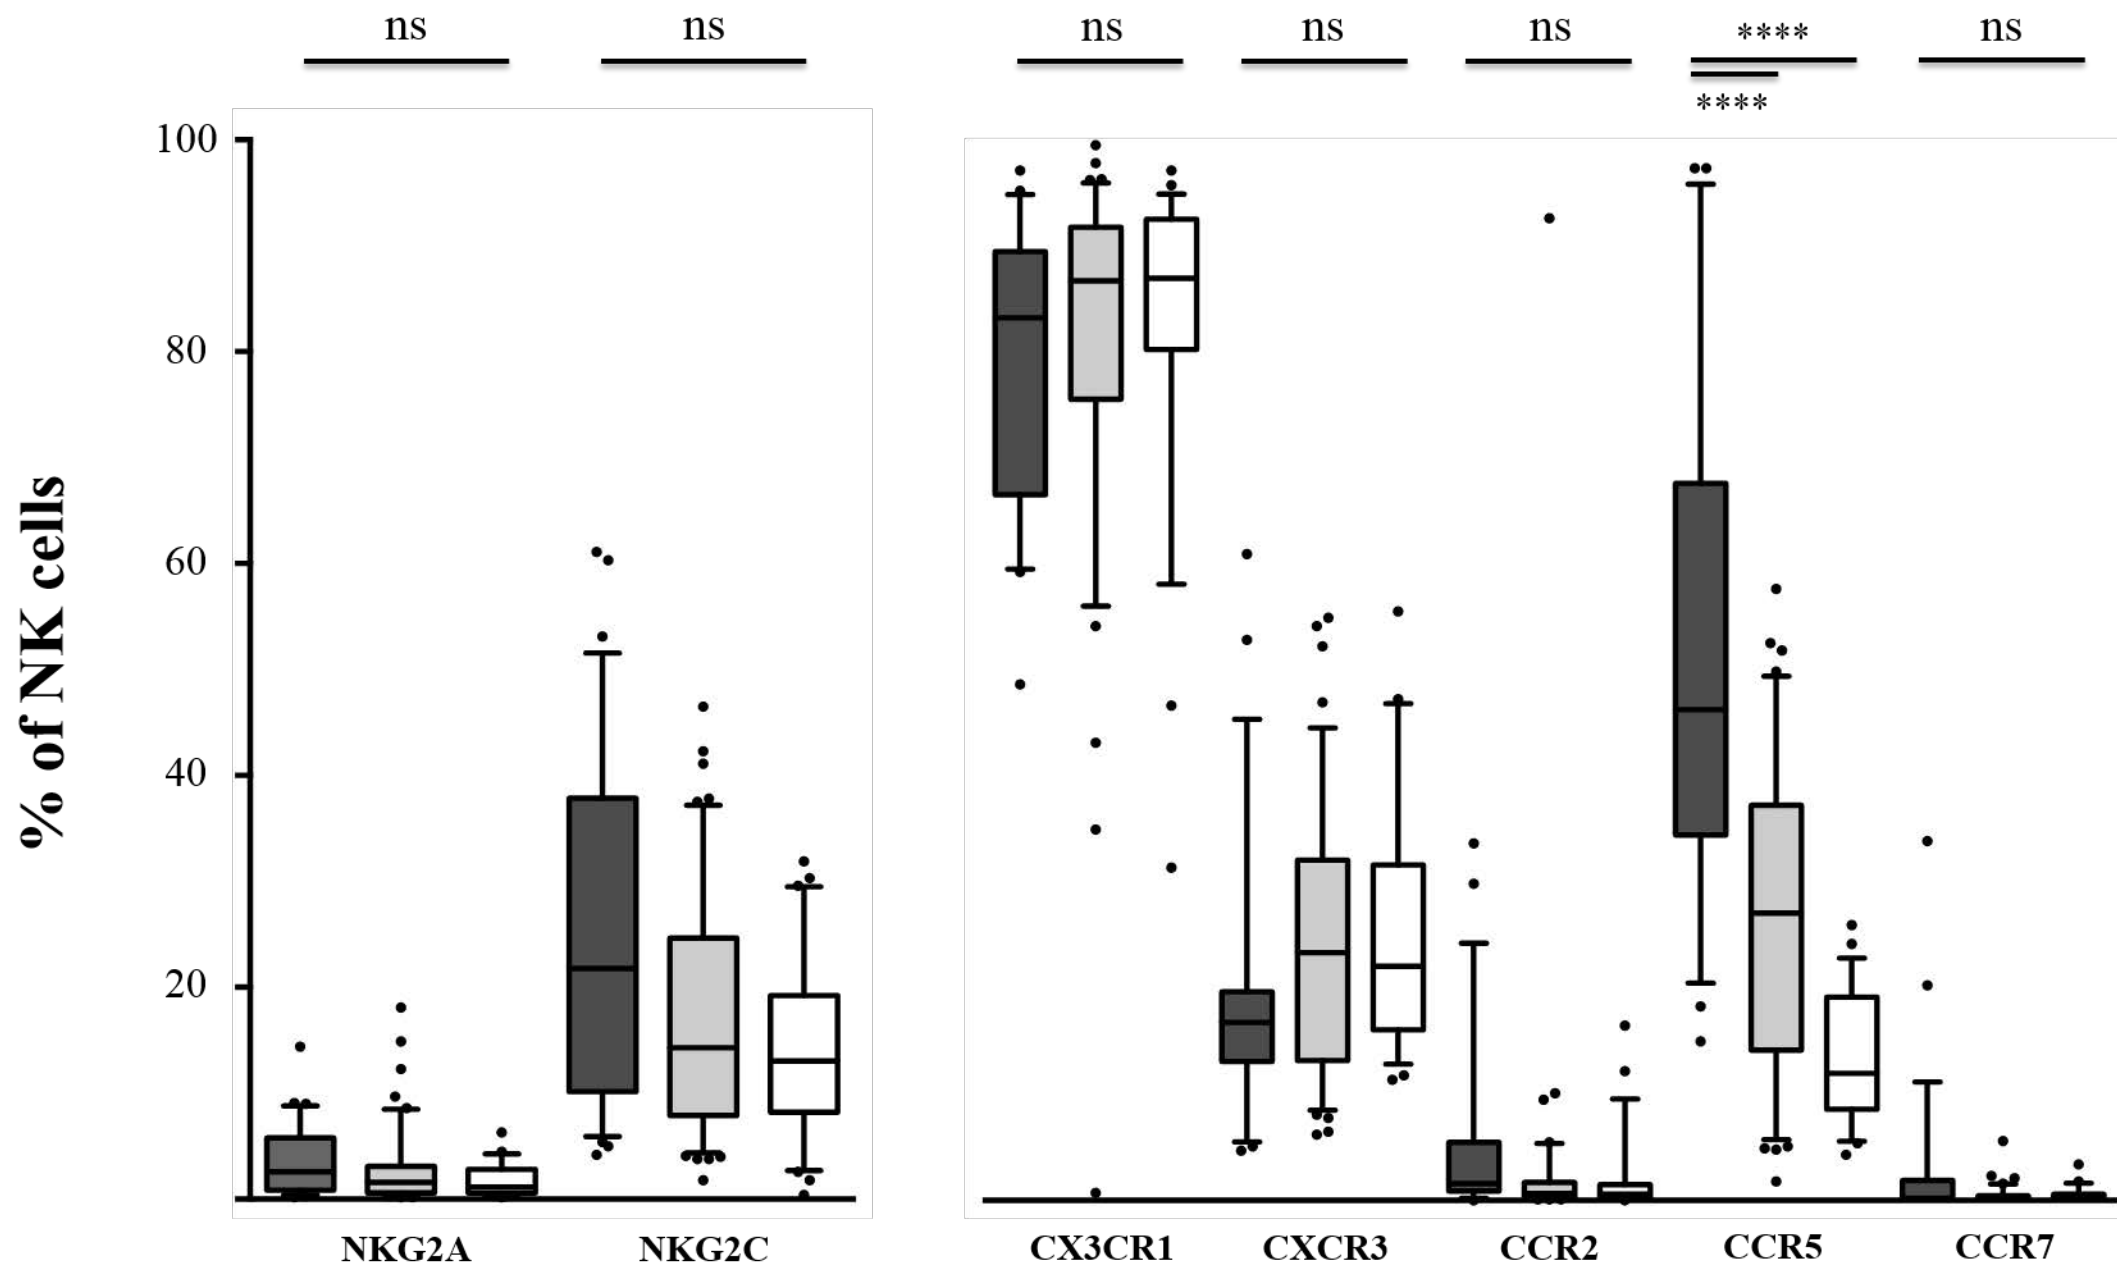

**Figure S1. Detailed NK cells phenotyping in the 3 groups.**

No statistical differences for all these markers excepted for CCR5.

Each point represents an outlier (error bars, 10<sup>th</sup> and 90<sup>th</sup> percentiles).

\*\*\*\*  $p < 0.0001$  - \*\*\*  $p < 0.001$  - \*\*  $p < 0.01$  - \*  $p < 0.05$  - ns (not significant).

*Statistics* : Mann-Whitney U test (2 groups) and Kruskal-Wallis test (3 groups)

MFI : median fluorescence intensity.

HLH   
 DC   
 HC

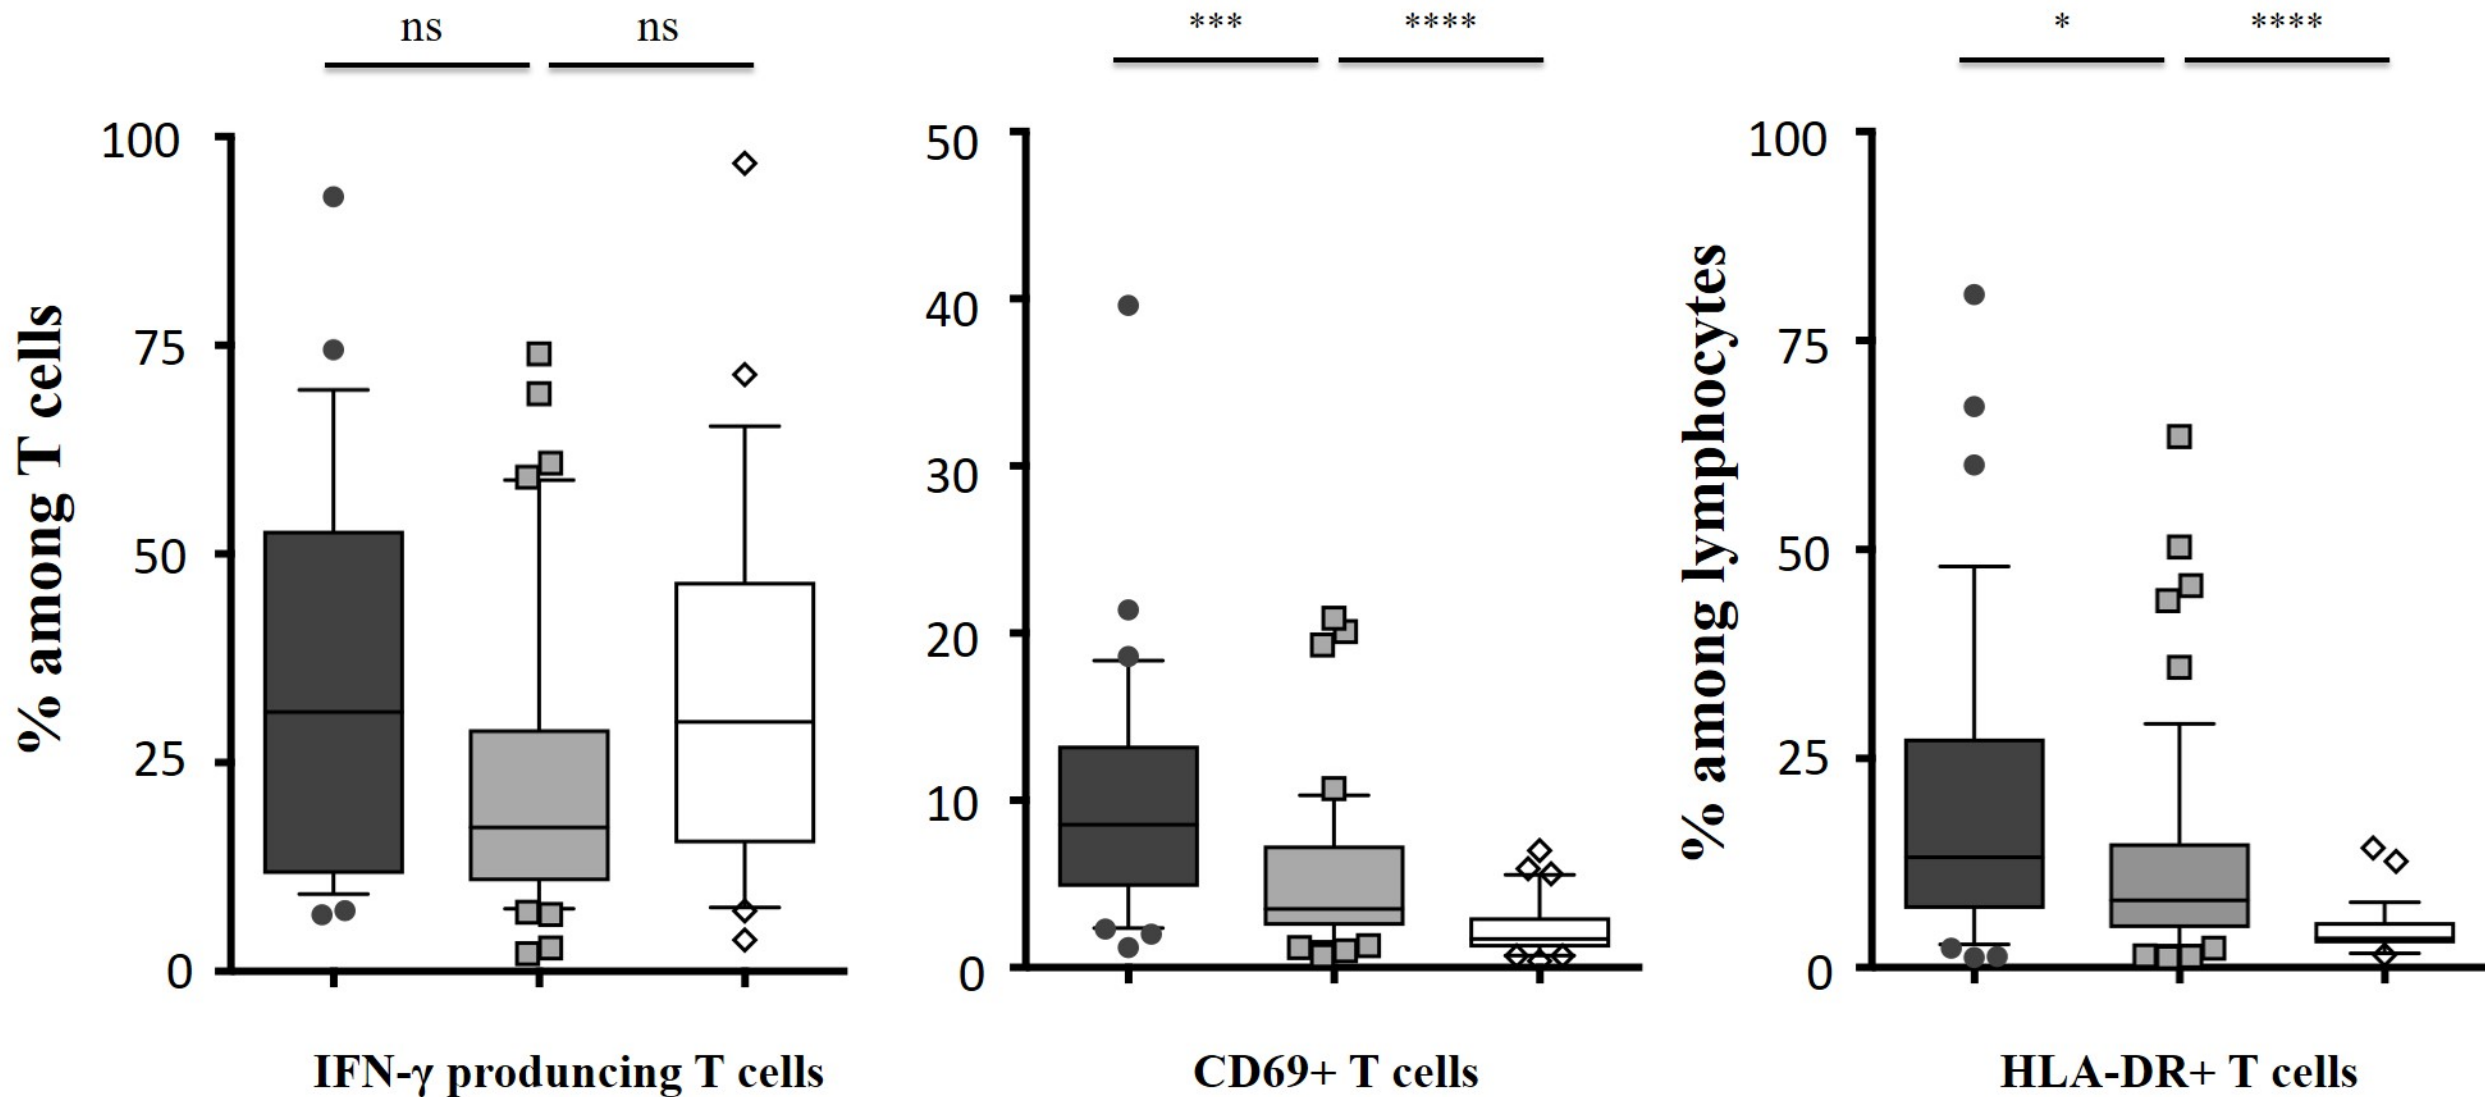

**Figure S2. T cells phenotyping in the 3 groups.**

No statistical difference in the capacity of T cells to produce IFN- $\gamma$  (in vitro PMA-ionomycin stimulation).

Higher T cells expression of activation markers (CD69 and HLA-DR) in HLH patients.

Each point represents an outlier (error bars, 10<sup>th</sup> and 90<sup>th</sup> percentiles).

\*\*\*\* p < 0.0001 - \*\*\* p < 0.001 - \*\* p < 0.01 - \* p < 0.05 - ns (not significant).

*Statistics* : Mann-Whitney U test (2 groups) and Kruskal-Wallis test (3 groups)

MFI : median fluorescence intensity.

HLH   
 DC   
 HC

**Table S1A. Lymphocyte blood counts in the 3 groups.**

|                                                               | HLH              | DC                | HC                 | <i>p</i> |
|---------------------------------------------------------------|------------------|-------------------|--------------------|----------|
|                                                               | n = 68           | n = 34            | n = 34             |          |
| <b>Lymphocytes/mm<sup>3</sup></b>                             |                  |                   |                    |          |
| Total                                                         | 574 [182 - 1810] | 1240 [518 - 4348] | 1910 [1324 - 2641] | < 0.001  |
| B cells ( <i>CD19</i> <sup>+</sup> )                          | 54 [2 - 225]     | 109 [25 - 533]    | 226 [111 - 369]    | < 0.001  |
| T cells ( <i>CD3</i> <sup>+</sup> )                           | 474 [135 - 1412] | 981 [340 - 2816]  | 1441 [945 - 1990]  | < 0.001  |
| <i>CD3</i> <sup>+</sup> <i>CD4</i> <sup>+</sup>               | 268 [46 - 612]   | 563 [178 - 1340]  | 869 [603 - 1313]   | < 0.001  |
| <i>CD3</i> <sup>+</sup> <i>CD8</i> <sup>+</sup>               | 202 [26 - 571]   | 353 [106 - 1292]  | 443 [271 - 722]    | < 0.001  |
| NK cells ( <i>CD3</i> <sup>-</sup> <i>CD56</i> <sup>+</sup> ) | 32 [7 - 98]      | 128 [39 - 632]    | 210 [109 - 401]    | < 0.001  |

*Statistics:* Kruskal-Wallis test**Table S1B. Lymphocyte counts during HLH and after recovery.**

|                                                               | During HLH       | After recovery    | <i>p</i> |
|---------------------------------------------------------------|------------------|-------------------|----------|
|                                                               | n = 15           | n = 15            |          |
| <b>Lymphocytes/mm<sup>3</sup></b>                             |                  |                   |          |
| Total                                                         | 430 [202 - 1366] | 1103 [410 - 2259] | 0.002    |
| B cells ( <i>CD19</i> <sup>+</sup> )                          | 32 [0 - 123]     | 34 [0 - 272]      | 0.94     |
| T cells ( <i>CD3</i> <sup>+</sup> )                           | 410 [135 - 1256] | 883 [288 - 1712]  | 0.01     |
| NK cells ( <i>CD3</i> <sup>-</sup> <i>CD56</i> <sup>+</sup> ) | 33 [5 - 75]      | 111 [50 - 417]    | 0.0002   |

*Statistics:* Mann-Whitney U-test

**Table S2A. Characteristics of the heterozygous HLH-gene mutations identified**

| Gene          | Base change       | AA change                                | SIFT               | Polyphen-2               | RsID         | MAF (%) |
|---------------|-------------------|------------------------------------------|--------------------|--------------------------|--------------|---------|
| <b>PRF1</b>   | <b>c.C272T</b>    | <b>p.A91V</b>                            | <b>Deleterious</b> | <b>Probably damaging</b> | rs35947132   | 4.6     |
|               | C1139G            | p.P380R                                  | Tolerated          | Benign                   | rs530097547  | 0.02    |
|               | C65T              | p.P22L                                   | Tolerated          | Benign                   | rs528937278  | 0.02    |
|               | A755G             | p.N252S                                  | Tolerated          | Benign                   | rs28933375   | 0.76    |
|               | c.G530A           | p.R177H                                  | Tolerated          | Benign                   | rs774503938  | -       |
| <b>STX11</b>  | c.A829G           | T277A                                    | Tolerated          | Benign                   | rs9496891    | 4.1     |
| <b>UNC13D</b> | c.A2542C          | p.I848L                                  | Tolerated          | Benign                   | rs144968313  | 0.06    |
|               | c.G2983C          | A995P                                    | Tolerated          | Benign                   | rs138760432  | 0.06    |
|               | c.C904T           | p.L302F                                  | Tolerated          | Benign                   | rs55661958   | 0.02    |
|               | c.C2782T          | p.R928C                                  | Tolerated          | Benign                   | rs35037984   | 2.25    |
|               | <b>c.C536G</b>    | <b>p.T179R</b>                           | <b>Deleterious</b> | <b>Probably damaging</b> | -            | -       |
|               | c.G2696A          | p.R899Q                                  | Tolerated          | Benign                   | rs1456196107 | 0.00    |
|               | c.G2955_4A        | In silico prediction: no splicing effect |                    | -                        | rs760466426  | 0.003   |
|               | C.G2830+7A        | In silico prediction: no splicing effect |                    |                          | rs 201023196 | 0.04    |
| <b>LYST</b>   | <b>c.A6482C</b>   | <b>p.E2161A</b>                          | <b>Deleterious</b> | Benign                   | rs147756847  | 0.6     |
|               | c.C1384T          | p.P462S                                  | Tolerated          | Benign                   | rs77848653   | 0.01    |
|               | c.T574G           | p.L192V                                  | Tolerated          | Benign                   | rs7524261    | 0.07    |
|               | c.G3050A          | p.S1017N                                 | Tolerated          | Benign                   | rs10465613   | 4.7     |
|               | c.A3208G          | p.I1070V                                 | Tolerated          | Benign                   | rs150321124  | 0.01    |
|               | c.A3989C          | p.D1330A                                 | Tolerated          | Benign                   | rs74641549   | 4.4     |
|               | C7352-7354 delTTC | p.LL2451L                                | In frame deletion  |                          |              | 0.05    |
|               | c.T7793A          | p.F2598Y                                 | Tolerated          | Benign                   | rs34642241   | 2.6     |
|               | c.G8411A          | p.G2804D                                 | Tolerated          | Benign                   | rs35333195   | 4.4     |
|               | <b>c.C7870T</b>   | <b>p.R2624W</b>                          | Deleterious        | <b>Probably damaging</b> | rs150306354  | 0.37    |
|               | c.A143G           | p.H48R                                   | Tolerated          | Benign                   | rs200132460  | 0.008   |
|               | <b>c.C8216T</b>   | <b>p.T2739I</b>                          | Tolerated          | <b>Probably damaging</b> | rs1443276945 | -       |

AA: amino acid

SIFT: Sorting Intolerant From Tolerant - Program that predicts whether an amino acid substitution affects protein function

PolyPhen-2 : Polymorphism Phenotyping v2

SIFT and Polyphen-2 are softwares predicting possible impact of AA substitution

rsID : reference SNP (Single Nucleotide Polymorphism) identity

MAF: mean allele frequency

**Table S2B. Detailed mutations in the 15 patients out of 29 with an acquired HLH**

| Patients  | PRF1                    | UNC13D                                 | STX11            | LYST                                                                                                                                                       |
|-----------|-------------------------|----------------------------------------|------------------|------------------------------------------------------------------------------------------------------------------------------------------------------------|
| <b>1</b>  |                         | c.A2542C; p.I848L<br>c.G2983C; p.A995P |                  | c.A6482C; p.E2161A                                                                                                                                         |
| <b>2</b>  | <b>c.C272T; p.A91V*</b> | c.C904T; p.L302F                       |                  | c.C1384T; p.P462S                                                                                                                                          |
| <b>3</b>  |                         |                                        |                  | c.T574G; p.L192V<br>c.G3050A; p.S1017N<br>c.A3208G; p.I1070V<br>c.A3989C; p.D1330A<br>c.T7793A; p.F2598Y<br>c.G8411A; p.G2804D<br>c.7352-7354del; p.L2451L |
| <b>4</b>  | c.C1139G; p.P380R       |                                        |                  |                                                                                                                                                            |
| <b>5</b>  |                         |                                        |                  | <b>c.C7870T; p.R2624W*</b>                                                                                                                                 |
| <b>6</b>  |                         |                                        | c.A829G; p.T277A |                                                                                                                                                            |
| <b>7</b>  |                         |                                        |                  | <b>c.A6482C; p.E2161A*</b>                                                                                                                                 |
| <b>8</b>  |                         |                                        |                  | c.A143G; p.H48R                                                                                                                                            |
| <b>9</b>  | c.C65T; p.P22L          |                                        |                  |                                                                                                                                                            |
| <b>10</b> |                         | c.G2955-4A                             |                  |                                                                                                                                                            |
| <b>11</b> | c.A755G; p.N252S        |                                        |                  |                                                                                                                                                            |
| <b>12</b> | c.G530A; p.R177H        | c.C2782T; p.R928C                      |                  | <b>c.C8216T; p.T2739I*</b>                                                                                                                                 |
| <b>13</b> |                         | c.G2830+7A                             |                  |                                                                                                                                                            |
| <b>14</b> |                         | <b>c.C536G; p.T179R*</b>               |                  |                                                                                                                                                            |
| <b>15</b> | <b>c.C272T; p.A91V*</b> | c.G2696A; p.R899Q                      |                  |                                                                                                                                                            |

\* Mutations predicted in silico to be deleterious
